# Supplementary material for: Neuroinflammatory Profiling in SIV-Infected Chinese-Origin Rhesus Macaques on Antiretroviral Therapy
Source: MDPI journal article supplement (doi:10.3390/v14010139), 2022-01-13
Supplement: s1 [file s1]

# RT<sup>2</sup> Profiler PCR Array Gene Expression Analysis Report

Summer Iqbal

Wednesday, June 26, 2019

---

# Table of Contents

|                                        |    |
|----------------------------------------|----|
| <b>Introduction</b>                    | 1  |
| <b>Summary and workflow</b>            | 2  |
| <b>Gene table</b>                      | 3  |
| <b>Data analysis setup</b>             | 5  |
| <b>Data quality control (QC)</b>       | 6  |
| <b>Normalization analysis</b>          | 7  |
| <b>Results</b>                         | 8  |
| Fold regulation comparison and p-value | 8  |
| Scatter Plot                           | 10 |
| Volcano Plot                           | 16 |
| Heat Map                               | 22 |
| ClusterGram                            | 24 |
| <b>What's next?</b>                    | 25 |
| Gene Expression                        | 27 |
| DNA Methylation                        | 27 |
| RNAi                                   | 27 |
| Somatic Mutation                       | 27 |
| miRNA Regulation                       | 29 |
| Transcription Factor / Histone         | 33 |
| <b>Next steps</b>                      | 35 |
| <b>Glossary</b>                        | 36 |

---

# Introduction

## Cataloged arrays

RT<sup>2</sup> Profiler PCR Arrays are highly reliable and sensitive gene expression profiling tools for analyzing focused panels of genes in signal transduction, biological processes or disease research pathways using real-time PCR. Each cataloged RT<sup>2</sup> Profiler PCR Array contains a list of the pathway-focused genes as well as five housekeeping (reference) genes on the array. In addition, each array contains a panel of proprietary controls to monitor genomic DNA contamination (GDC) as well as the first strand synthesis (RTC) and real-time PCR efficiency (PPC). The qPCR Assays used in PCR Arrays are laboratory-verified and optimized to work under standard conditions enabling a large number of genes to be assayed simultaneously. Their specificity is guaranteed when RT<sup>2</sup> SYBR Green qPCR Master Mixes are used as part of the complete PCR Array System protocol.

In this study, 96 genes were profiled on 12 samples with the PAQQ-011Z.

---

# Summary and workflow

## Cataloged arrays

1. Mature RNA was isolated using an RNA extraction kit according to the manufacturer's instructions.
2. RNA quality was determined using a spectrophotometer and was reverse transcribed using a cDNA conversion kit.
3. The cDNA was used on the real-time RT<sup>2</sup> Profiler PCR Array (QIAGEN, Cat. no. PAQQ-011Z) in combination with RT<sup>2</sup> SYBR® Green qPCR Mastermix (Cat. no. 330529).

C<sub>T</sub> values were exported to an Excel file to create a table of C<sub>T</sub> values. This table was then uploaded on to the data analysis web portal at <http://www.qiagen.com/geneglobe>. Samples were assigned to controls and test groups. C<sub>T</sub> values were normalized based on a/an Manual Selection of reference genes.

The data analysis web portal calculates fold change/regulation using delta delta C<sub>T</sub> method, in which delta C<sub>T</sub> is calculated between gene of interest (GOI) and an average of reference genes (HKG), followed by delta-delta C<sub>T</sub> calculations (delta C<sub>T</sub> (Test Group)-delta C<sub>T</sub> (Control Group)). Fold Change is then calculated using  $2^{(-\text{delta delta } C_T)}$  formula. The data analysis web portal also plots scatter plot, volcano plot, clustergram, and heat map.

This data analysis report was exported from the QIAGEN web portal at GeneGlobe.

# Gene table

## RT<sup>2</sup> Profiler™ PCR Array Rhesus Macaque Inflammatory Cytokines & Receptors

| Position | RefSeq Number | Symbol  | Description                                                                                               |
|----------|---------------|---------|-----------------------------------------------------------------------------------------------------------|
| A01      | XM_001083775  | AIMP1   | Aminoacyl tRNA synthetase complex-interacting multifunctional protein 1                                   |
| A02      | XM_001115987  | BMP2    | Bone morphogenetic protein 2                                                                              |
| A03      | NM_001032849  | CCL1    | Chemokine (C-C motif) ligand 1                                                                            |
| A04      | NM_001032874  | CCL11   | Chemokine (C-C motif) ligand 11                                                                           |
| A05      | XM_001113462  | CCL13   | Chemokine (C-C motif) ligand 13                                                                           |
| A06      | NM_001032852  | CCL17   | Chemokine (C-C motif) ligand 17                                                                           |
| A07      | NM_001032821  | CCL2    | Chemokine (C-C motif) ligand 2                                                                            |
| A08      | NM_001032854  | CCL20   | Chemokine (C-C motif) ligand 20                                                                           |
| A09      | NM_001032946  | CCL23   | Chemokine (C-C motif) ligand 23                                                                           |
| A10      | NM_001032850  | CCL5    | Chemokine (C-C motif) ligand 5                                                                            |
| A11      | NM_001032858  | CCR1    | Chemokine (C-C motif) receptor 1                                                                          |
| A12      | NM_001047140  | CCR3    | Chemokine (C-C motif) receptor 3                                                                          |
| B01      | XM_001098807  | CCR4    | Chemokine (C-C motif) receptor 4                                                                          |
| B02      | NM_001032935  | CCR6    | Chemokine (C-C motif) receptor 6                                                                          |
| B03      | XM_001084047  | CCR8    | Chemokine (C-C motif) receptor 8                                                                          |
| B04      | NM_001032839  | CD40LG  | CD40 ligand                                                                                               |
| B05      | XM_001088935  | CD70    | CD70 antigen-like                                                                                         |
| B06      | XM_001090841  | CSF1    | Colony stimulating factor 1 (macrophage)                                                                  |
| B07      | NM_001032949  | CSF2    | Colony stimulating factor 2 (granulocyte-macrophage)                                                      |
| B08      | NM_001032881  | CX3CL1  | Chemokine (C-X3-C motif) ligand 1                                                                         |
| B09      | XM_001084526  | CX3CR1  | Chemokine (C-X3-C motif) receptor 1                                                                       |
| B10      | NM_001032950  | CXCL11  | Chemokine (C-X-C motif) ligand 11                                                                         |
| B11      | NM_001032934  | CXCL12  | Chemokine (C-X-C motif) ligand 12                                                                         |
| B12      | NM_001032880  | CXCL13  | Chemokine (C-X-C motif) ligand 13                                                                         |
| C01      | XM_001103136  | CXCL6   | Chemokine (C-X-C motif) ligand 6 (granulocyte chemotactic protein 2)                                      |
| C02      | NM_001032936  | CXCL9   | Chemokine (C-X-C motif) ligand 9                                                                          |
| C03      | NM_001040420  | CXCR1   | Chemokine (C-X-C motif) receptor 1                                                                        |
| C04      | NM_001042645  | CXCR4   | Chemokine (C-X-C motif) receptor 4                                                                        |
| C05      | NM_001032838  | FASLG   | Fas ligand (TNF superfamily, member 6)                                                                    |
| C06      | NM_001135794  | IFNA2   | Interferon, alpha 2                                                                                       |
| C07      | NM_001032905  | IFNG    | Interferon-gamma                                                                                          |
| C08      | XM_001092736  | IL10RA  | Interleukin 10 receptor, alpha                                                                            |
| C09      | XM_001094340  | IL10RB  | Interleukin-10 receptor subunit beta-like                                                                 |
| C10      | XM_001093448  | IL11RA  | Interleukin 11 receptor, alpha                                                                            |
| C11      | NM_001044725  | IL12B   | Interleukin 12B (natural killer cell stimulatory factor 2, cytotoxic lymphocyte maturation factor 2, p40) |
| C12      | XM_001115186  | IL12RB1 | Interleukin 12 receptor, beta 1                                                                           |
| D01      | XM_001094235  | IL12RB2 | Interleukin 12 receptor, beta 2                                                                           |
| D02      | NM_001032929  | IL13    | Interleukin 13                                                                                            |
| D03      | NM_001044731  | IL15    | Interleukin 15                                                                                            |
| D04      | NM_001079517  | IL15RA  | Interleukin 15 receptor, alpha                                                                            |
| D05      | NM_001032808  | IL16    | Interleukin 16                                                                                            |
| D06      | XM_001106391  | IL17A   | Interleukin 17A                                                                                           |
| D07      | XM_001106517  | IL17F   | Interleukin-17F-like                                                                                      |
| D08      | NM_001042757  | IL1A    | Interleukin 1, alpha                                                                                      |
| D09      | NM_001042756  | IL1B    | Interleukin 1, beta                                                                                       |
| D10      | XM_001107510  | IL1R1   | Interleukin 1 receptor, type I                                                                            |

| Position | RefSeq Number | Symbol    | Description                                                              |
|----------|---------------|-----------|--------------------------------------------------------------------------|
| D11      | NM_001047134  | IL1R2     | Interleukin 1 receptor, type II                                          |
| D12      | XM_001091717  | IL1RN     | Interleukin 1 receptor antagonist                                        |
| E01      | NM_001047130  | IL2       | Interleukin 2                                                            |
| E02      | XM_001084726  | IL20      | Interleukin 20                                                           |
| E03      | XM_001103613  | IL21      | Interleukin 21                                                           |
| E04      | NM_001032917  | IL2RA     | Interleukin 2 receptor, alpha                                            |
| E05      | XM_001085792  | IL2RB     | Interleukin 2 receptor, beta                                             |
| E06      | NM_001035529  | IL2RG     | Interleukin 2 receptor, gamma                                            |
| E07      | NM_001101734  | IL3       | Interleukin 3 (colony-stimulating factor, multiple)                      |
| E08      | NM_001032904  | IL4       | Interleukin 4                                                            |
| E09      | NM_001047133  | IL5       | Interleukin 5 (colony-stimulating factor, eosinophil)                    |
| E10      | XM_001100843  | IL5RA     | Interleukin 5 receptor, alpha                                            |
| E11      | NM_001042733  | IL6       | Interleukin 6 (interferon, beta 2)                                       |
| E12      | XM_001114404  | IL6R      | Interleukin 6 receptor                                                   |
| F01      | NM_001032846  | IL7       | Interleukin 7                                                            |
| F02      | NM_001032965  | CXCL8     | Interleukin 8                                                            |
| F03      | XM_015111045  | CXCR2     | Chemokine (C-X-C motif) receptor 2                                       |
| F04      | XM_001100521  | IL9R      | Interleukin 9 receptor                                                   |
| F05      | XM_001102628  | IL13RA2   | Interleukin-13 receptor subunit alpha-2-like                             |
| F06      | XM_001099282  | LOC710618 | Hypothetical LOC710618                                                   |
| F07      | XM_001110897  | IL9       | Interleukin-9-like                                                       |
| F08      | XM_001113381  | CCL7      | Chemokine (C-C motif) ligand 7                                           |
| F09      | XM_001109808  | CCL26     | C-C motif chemokine 26-like                                              |
| F10      | NM_001047148  | LTA       | Lymphotoxin alpha (TNF superfamily, member 1)                            |
| F11      | NM_001032915  | MIF       | Macrophage migration inhibitory factor (glycosylation-inhibiting factor) |
| F12      | XM_001090562  | NAMPT     | Nicotinamide phosphoribosyltransferase                                   |
| G01      | XM_001110148  | OSM       | Oncostatin M                                                             |
| G02      | XM_001102788  | PF4       | Platelet factor 4                                                        |
| G03      | XM_001093307  | SPP1      | Secreted phosphoprotein 1                                                |
| G04      | NM_001047149  | TNF       | Tumor necrosis factor                                                    |
| G05      | XM_001096915  | TNFRSF11B | Tumor necrosis factor receptor superfamily, member 11b                   |
| G06      | XM_001084768  | TNFSF10   | Tumor necrosis factor (ligand) superfamily, member 10                    |
| G07      | XM_001092669  | TNFSF11   | Tumor necrosis factor (ligand) superfamily, member 11                    |
| G08      | XM_001082247  | TNFSF13B  | Tumor necrosis factor (ligand) superfamily, member 13b                   |
| G09      | XM_001089169  | TNFSF14   | Tumor necrosis factor (ligand) superfamily, member 14                    |
| G10      | XM_001101190  | TNFSF4    | Tumor necrosis factor (ligand) superfamily, member 4                     |
| G11      | XM_001089925  | VEGFA     | Vascular endothelial growth factor A                                     |
| G12      | NM_001032947  | XCL1      | Chemokine (C motif) ligand 1                                             |
| H01      | NM_001033084  | ACTB      | Actin, beta                                                              |
| H02      | NM_001047137  | B2M       | Beta-2-microglobulin                                                     |
| H03      | NM_001195426  | GAPDH     | Glyceraldehyde-3-phosphate dehydrogenase                                 |
| H04      | XM_001097691  | LOC709186 | Hypoxanthine-guanine phosphoribosyltransferase-like                      |
| H05      | XM_001115079  | RPL13A    | Ribosomal protein L13A                                                   |
| H06      | SA_00125      | QGDC      | Rhesus Macaque Genomic DNA Contamination                                 |
| H07      | SA_00104      | RTC       | Reverse Transcription Control                                            |
| H08      | SA_00104      | RTC       | Reverse Transcription Control                                            |
| H09      | SA_00104      | RTC       | Reverse Transcription Control                                            |
| H10      | SA_00103      | PPC       | Positive PCR Control                                                     |
| H11      | SA_00103      | PPC       | Positive PCR Control                                                     |
| H12      | SA_00103      | PPC       | Positive PCR Control                                                     |

---

## Data analysis setup

### Sample management

| Control Group | Group 1 | Group 2 |
|---------------|---------|---------|
| IR44          | FJ69    | EP22    |
| IC80          | EN60    | GH09    |
| JV66          | DI62    | EP49    |
| JI34          |         | JH54    |
| JD56          |         |         |

### Pre-amplification

A pre-amplification using the appropriate species- and pathway-specific RT<sup>2</sup> PreAMP Primer Mix was not performed and the appropriate corrections were made during the data analysis procedure.

### Lower limit of detection

The C<sub>T</sub> cut-off was set to 35

---

## Data quality control (QC)

### Quality checks performed and results

| Test Performed               | Test Result        |
|------------------------------|--------------------|
| 1. PCR Array Reproducibility | All Samples Passed |
| 2. RT Efficiency             | All Samples Passed |
| 3. Genomic DNA Contamination | All Samples Passed |



---

# Normalization analysis

## Manual Selection

| Groups        | Samples | ACTB      | B2M       | GAPDH     | LOC709186 | RPL13A    | Arithmetic Mean | Average Arithmetic Mean |
|---------------|---------|-----------|-----------|-----------|-----------|-----------|-----------------|-------------------------|
| Control Group | IR44    | 19.382416 | 19.18128  | 18.76834  | 21.58224  | 22.630383 | 20.31           | 22.68                   |
| Control Group | IC80    | 19.480572 | 19.844894 | 18.954979 | 22.31814  | 22.83334  | 20.69           |                         |
| Control Group | JV66    | 25.026503 | 21.436218 | 20.55034  | 24.654093 | 24.318314 | 23.20           |                         |
| Control Group | JI34    | 25.420666 | 24.325623 | 24.366943 | 25.953773 | 26.126802 | 25.24           |                         |
| Control Group | JD56    | 24.52721  | 22.755308 | 22.292664 | 25.477743 | 24.78266  | 23.97           |                         |
| Group 1       | FJ69    | 22.210855 | 21.718853 | 22.586597 | 24.846687 | 26.307396 | 23.53           | 22.84                   |
| Group 1       | EN60    | 20.71973  | 20.689894 | 21.4477   | 23.195189 | 24.768885 | 22.16           |                         |
| Group 1       | DI62    | 21.84152  | 21.160624 | 22.390528 | 23.10165  | 25.68201  | 22.84           |                         |
| Group 2       | EP22    | 23.707851 | 23.145807 | 23.024384 | 25.433107 | 27.377485 | 24.54           | 23.99                   |
| Group 2       | GH09    | 22.53764  | 21.525318 | 21.868061 | 26.136717 | 26.665062 | 23.75           |                         |
| Group 2       | EP49    | 22.73471  | 21.74011  | 22.384611 | 26.689528 | 26.484142 | 24.01           |                         |
| Group 2       | JH54    | 22.261955 | 22.021616 | 22.306747 | 25.860516 | 25.79681  | 23.65           |                         |

This method allows researchers to select their own internal control / housekeeping / normalization genes for the analysis. Select either the use of the Geometric or Arithmetic Mean consistently across experiments. As a general guide, only select genes with small changes in their expression across different sample groups (differences in  $C_T$  values less than 1).

---

## Results

### Fold regulation comparison and p-value

| Control Group | Test Group | Fold Regulation cut off | p-Value cut off |
|---------------|------------|-------------------------|-----------------|
| Control Group | Group 1    | 2                       | 0.05            |

| Position | Gene Symbol | Fold Regulation | p-Value  | Comments |
|----------|-------------|-----------------|----------|----------|
| A01      | AIMP1       | 60.62           | 0.000589 |          |
| A02      | BMP2        | 4.90            | 0.013781 |          |
| B06      | CSF1        | -8.58           | 0.000622 | A        |
| B08      | CX3CL1      | -6.26           | 0.009253 | A        |
| B11      | CXCL12      | 4.23            | 0.038022 | A        |
| C09      | IL10RB      | 11.93           | 0.001345 | A        |
| D04      | IL15RA      | 5.58            | 0.002062 | A        |
| F02      | CXCL8       | 3.93            | 0.005739 |          |
| F03      | CXCR2       | 2.51            | 0.042693 |          |
| F12      | NAMPT       | 3.72            | 0.003853 |          |
| G03      | SPP1        | 77.25           | 0.016522 |          |
| G06      | TNFSF10     | 36.72           | 0.000249 | A        |

| Control Group | Test Group | Fold Regulation cut off | p-Value cut off |
|---------------|------------|-------------------------|-----------------|
| Control Group | Group 2    | 2                       | 0.05            |

| Position | Gene Symbol | Fold Regulation | p-Value  | Comments |
|----------|-------------|-----------------|----------|----------|
| A01      | AIMP1       | 52.35           | 0.000328 |          |
| A02      | BMP2        | 5.85            | 0.018389 |          |
| B06      | CSF1        | -4.28           | 0.000978 | A        |
| B08      | CX3CL1      | -3.28           | 0.008666 | A        |
| B11      | CXCL12      | 5.17            | 0.002062 |          |
| C09      | IL10RB      | 14.35           | 0.005420 | A        |
| C10      | IL11RA      | 11.79           | 0.020823 |          |
| D04      | IL15RA      | 4.24            | 0.021867 |          |
| D05      | IL16        | 8.23            | 0.003486 |          |
| E12      | IL6R        | 5.96            | 0.001006 |          |
| F07      | IL9         | 9.26            | 0.010594 |          |
| F12      | NAMPT       | 3.20            | 0.014483 |          |
| G06      | TNFSF10     | 40.67           | 0.000409 | A        |
| H05      | RPL13A      | -2.20           | 0.038891 |          |

**Fold-Change** ( $2^{(-\Delta\Delta C_T)}$ ) is the normalized gene expression ( $2^{(-\Delta C_T)}$ ) in the Test Sample divided the normalized gene expression ( $2^{(-\Delta C_T)}$ ) in the Control Sample. Fold-Regulation represents fold-change results in a biologically meaningful way. Fold-change values greater than one indicates a positive- or an up-regulation, and the fold-regulation is equal to the fold-change. Fold-change values less than one indicate a negative or down-regulation, and the fold-regulation is the negative inverse of the fold-change.

The p values are calculated based on a Student's t-test of the replicate  $2^{(-\Delta C_T)}$  values for each gene in the control group and treatment groups.

## Scatter Plot

| Test Group | Control Group | Fold Regulation Threshold |
|------------|---------------|---------------------------|
| Group 1    | Control Group | 2                         |

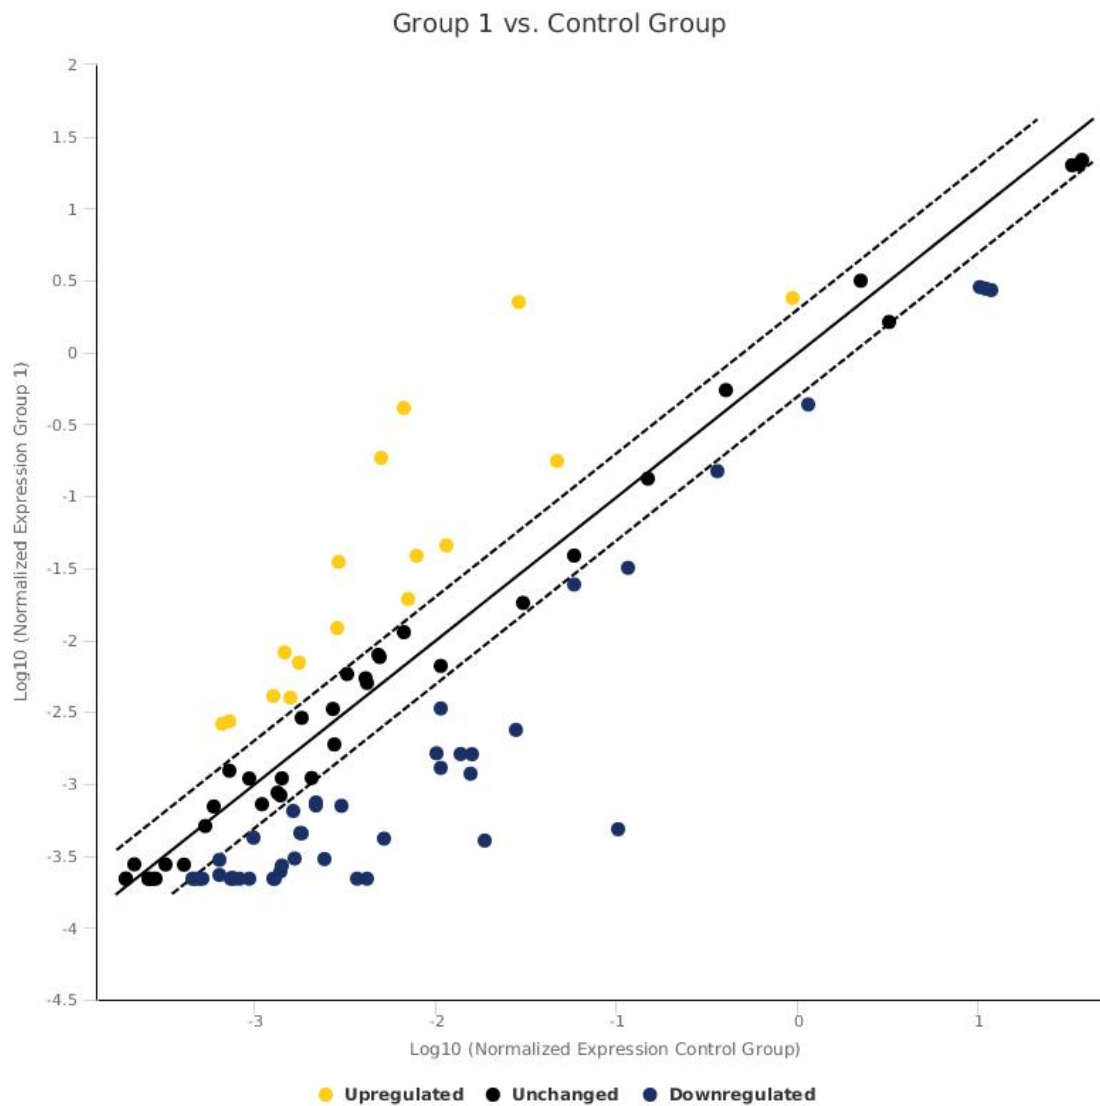

The scatter plot compares the normalized expression of every gene on the array between the two selected groups by plotting them against one another to quickly visualize large gene expression changes. The central line indicates unchanged gene expression. The dotted lines indicate the selected fold regulation threshold. Data points beyond the dotted lines in the upper left and lower right sections meet the selected fold regulation threshold.

## Genes Over-Expressed in Group 1 vs. Control Group

| Position | Gene Symbol | Fold Regulation | Comments | RT2 Catalog               |
|----------|-------------|-----------------|----------|---------------------------|
| G03      | SPP1        | 77.25           |          | <a href="#">PPQ08393A</a> |
| A01      | AIMP1       | 60.62           |          | <a href="#">PPQ01772B</a> |
| G06      | TNFSF10     | 36.72           | A        | <a href="#">PPQ01300B</a> |
| C09      | IL10RB      | 11.93           | A        | <a href="#">PPQ09121B</a> |
| D04      | IL15RA      | 5.58            | A        | <a href="#">PPQ13502B</a> |
| A02      | BMP2        | 4.90            |          | <a href="#">PPQ17096A</a> |
| B11      | CXCL12      | 4.23            | A        | <a href="#">PPQ00230A</a> |
| F02      | CXCL8       | 3.93            |          | <a href="#">PPQ00298A</a> |
| E12      | IL6R        | 3.92            |          | <a href="#">PPQ16038B</a> |
| D05      | IL16        | 3.92            | B        | <a href="#">PPQ00006A</a> |
| D01      | IL12RB2     | 3.77            | B        | <a href="#">PPQ05560B</a> |
| F12      | NAMPT       | 3.72            |          | <a href="#">PPQ04187A</a> |
| F07      | IL9         | 3.20            | B        | <a href="#">PPQ13177A</a> |
| C10      | IL11RA      | 2.71            |          | <a href="#">PPQ05242A</a> |
| H01      | ACTB        | 2.53            |          | <a href="#">PPQ00182A</a> |
| F03      | CXCR2       | 2.51            |          | <a href="#">PPQ05376B</a> |

## Genes Under-Expressed in Group 1 vs. Control Group

| Position | Gene Symbol | Fold Regulation | Comments | RT2 Catalog               |
|----------|-------------|-----------------|----------|---------------------------|
| G04      | TNF         | -210.24         | A        | <a href="#">PPQ15261B</a> |
| B04      | CD40LG      | -46.37          | A        | <a href="#">PPQ00062B</a> |
| D02      | IL13        | -19.17          | B        | <a href="#">PPQ00221A</a> |
| B07      | CSF2        | -16.96          | B        | <a href="#">PPQ00266A</a> |
| C08      | IL10RA      | -13.18          | A        | <a href="#">PPQ08033B</a> |
| G07      | TNFSF11     | -12.54          | B        | <a href="#">PPQ05082B</a> |
| E10      | IL5RA       | -11.77          | A        | <a href="#">PPQ08202B</a> |
| D08      | IL1A        | -9.86           | A        | <a href="#">PPQ05235B</a> |
| B06      | CSF1        | -8.58           | A        | <a href="#">PPQ06801A</a> |
| D10      | IL1R1       | -8.30           | A        | <a href="#">PPQ12806B</a> |
| B12      | CXCL13      | -8.17           | B        | <a href="#">PPQ00124A</a> |
| B08      | CX3CL1      | -6.26           | A        | <a href="#">PPQ00125A</a> |
| A09      | CCL23       | -5.90           | B        | <a href="#">PPQ00261A</a> |
| F10      | LTA         | -5.82           | B        | <a href="#">PPQ15229B</a> |
| B03      | CCR8        | -5.68           | B        | <a href="#">PPQ00839B</a> |
| C11      | IL12B       | -5.49           | B        | <a href="#">PPQ01495B</a> |
| F08      | CCL7        | -5.23           | B        | <a href="#">PPQ14785B</a> |
| H09      | RTC         | -4.36           |          | <a href="#">PPX63340A</a> |
| A05      | CCL13       | -4.27           | B        | <a href="#">PPQ14893B</a> |
| G09      | TNFSF14     | -4.26           | B        | <a href="#">PPQ06087A</a> |
| C12      | IL12RB1     | -4.01           | B        | <a href="#">PPQ00099A</a> |
| H08      | RTC         | -3.96           |          | <a href="#">PPX63340A</a> |
| A10      | CCL5        | -3.91           | B        | <a href="#">PPQ00080A</a> |
| F06      | LOC710618   | -3.74           | B        | <a href="#">PPQ12114B</a> |
| G05      | TNFRSF11B   | -3.63           |          | <a href="#">PPQ06360B</a> |
| H07      | RTC         | -3.55           |          | <a href="#">PPX63340A</a> |
| A12      | CCR3        | -3.49           | B        | <a href="#">PPQ13872B</a> |
| A06      | CCL17       | -3.38           | B        | <a href="#">PPQ00082A</a> |
| F04      | IL9R        | -3.37           | B        | <a href="#">PPQ07961B</a> |
| B10      | CXCL11      | -3.21           | A        | <a href="#">PPQ00267A</a> |
| E08      | IL4         | -3.10           | B        | <a href="#">PPQ00178A</a> |
| D11      | IL1R2       | -2.97           | B        | <a href="#">PPQ12748B</a> |
| D12      | IL1RN       | -2.74           | B        | <a href="#">PPQ06231B</a> |
| F11      | MIF         | -2.62           |          | <a href="#">PPQ00195A</a> |
| A03      | CCL1        | -2.54           | B        | <a href="#">PPQ00079A</a> |
| H05      | RPL13A      | -2.43           |          | <a href="#">PPQ00210B</a> |
| G08      | TNFSF13B    | -2.42           |          | <a href="#">PPQ00923B</a> |
| A04      | CCL11       | -2.35           | B        | <a href="#">PPQ00118A</a> |
| D07      | IL17F       | -2.32           | B        | <a href="#">PPQ10562B</a> |
| C07      | IFNG        | -2.28           | B        | <a href="#">PPQ00179A</a> |
| E01      | IL2         | -2.17           | B        | <a href="#">PPQ10428C</a> |
| C03      | CXCR1       | -2.16           | B        | <a href="#">PPQ00429B</a> |
| E03      | IL21        | -2.09           | B        | <a href="#">PPQ10506A</a> |

| Test Group | Control Group | Fold Regulation Threshold |
|------------|---------------|---------------------------|
| Group 2    | Control Group | 2                         |

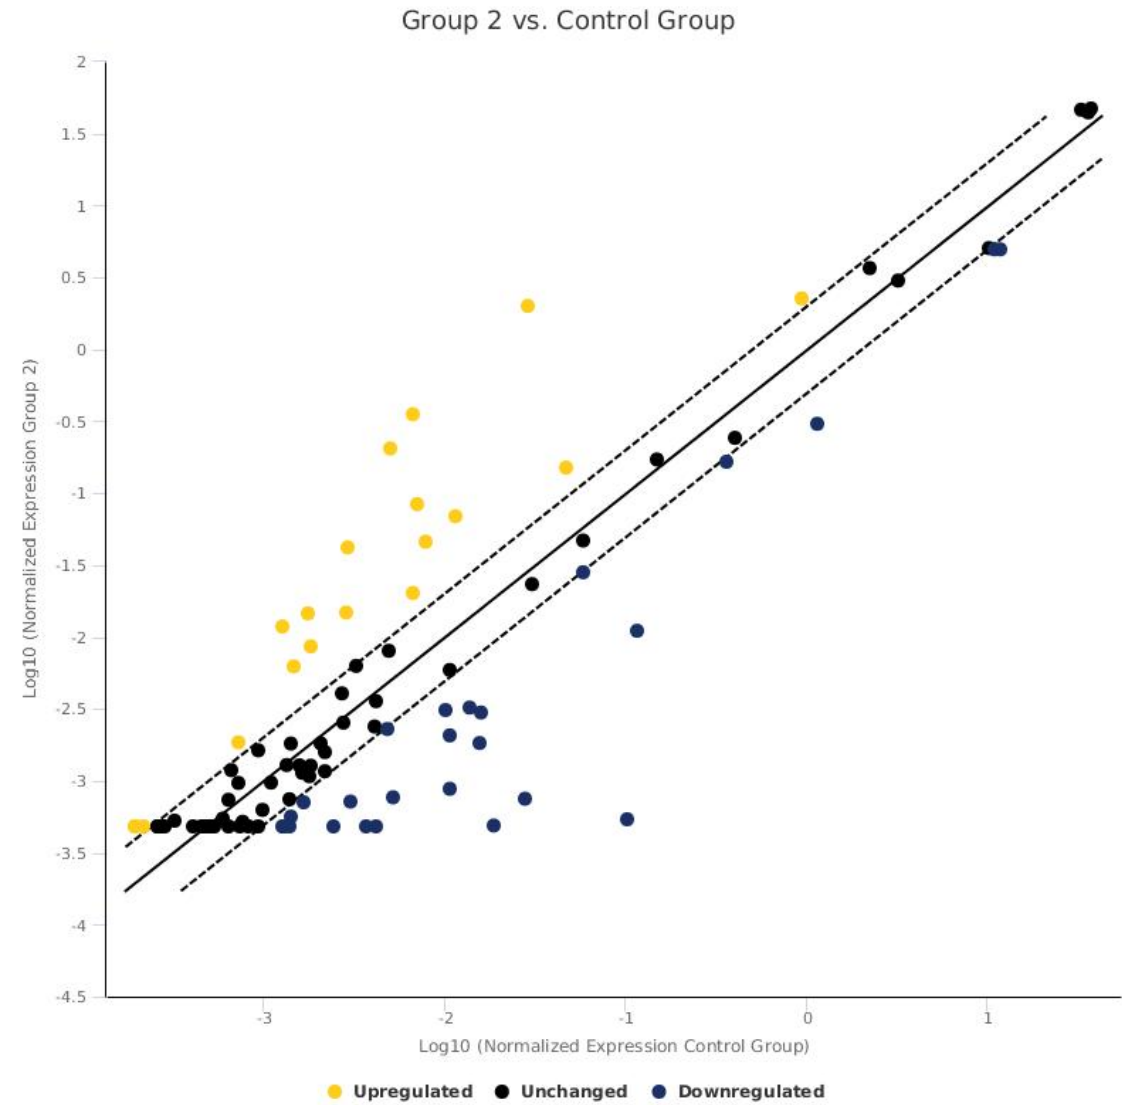

The scatter plot compares the normalized expression of every gene on the array between the two selected groups by plotting them against one another to quickly visualize large gene expression changes. The central line indicates unchanged gene expression. The dotted lines indicate the selected fold regulation threshold. Data points beyond the dotted lines in the upper left and lower right sections meet the selected fold regulation threshold.

## Genes Over-Expressed in Group 2 vs. Control Group

| Position | Gene Symbol | Fold Regulation | Comments | RT2 Catalog               |
|----------|-------------|-----------------|----------|---------------------------|
| G03      | SPP1        | 69.35           |          | <a href="#">PPQ08393A</a> |
| A01      | AIMP1       | 52.35           |          | <a href="#">PPQ01772B</a> |
| G06      | TNFSF10     | 40.67           | A        | <a href="#">PPQ01300B</a> |
| C09      | IL10RB      | 14.35           | A        | <a href="#">PPQ09121B</a> |
| C10      | IL11RA      | 11.79           |          | <a href="#">PPQ05242A</a> |
| F07      | IL9         | 9.26            |          | <a href="#">PPQ13177A</a> |
| D05      | IL16        | 8.23            |          | <a href="#">PPQ00006A</a> |
| E12      | IL6R        | 5.96            |          | <a href="#">PPQ16038B</a> |
| A02      | BMP2        | 5.85            |          | <a href="#">PPQ17096A</a> |
| B11      | CXCL12      | 5.17            |          | <a href="#">PPQ00230A</a> |
| A11      | CCR1        | 4.67            | B        | <a href="#">PPQ00088A</a> |
| D04      | IL15RA      | 4.24            |          | <a href="#">PPQ13502B</a> |
| F12      | NAMPT       | 3.20            |          | <a href="#">PPQ04187A</a> |
| C04      | CXCR4       | 3.04            |          | <a href="#">PPQ09953B</a> |
| D01      | IL12RB2     | 2.57            | B        | <a href="#">PPQ05560B</a> |
| H06      | QGDC        | 2.47            | C        |                           |
| D06      | IL17A       | 2.47            | C        | <a href="#">PPQ10504B</a> |
| H01      | ACTB        | 2.40            |          | <a href="#">PPQ00182A</a> |
| E02      | IL20        | 2.24            | B        | <a href="#">PPQ01456A</a> |



## Genes Under-Expressed in Group 2 vs. Control Group

| Position | Gene Symbol | Fold Regulation | Comments | RT2 Catalog               |
|----------|-------------|-----------------|----------|---------------------------|
| G04      | TNF         | -188.08         | A        | <a href="#">PPQ15261B</a> |
| B04      | CD40LG      | -38.17          | A        | <a href="#">PPQ00062B</a> |
| E10      | IL5RA       | -37.21          | A        | <a href="#">PPQ08202B</a> |
| B10      | CXCL11      | -12.17          | A        | <a href="#">PPQ00267A</a> |
| G05      | TNFRSF11B   | -10.45          | A        | <a href="#">PPQ06360B</a> |
| D02      | IL13        | -8.70           | B        | <a href="#">PPQ00221A</a> |
| C08      | IL10RA      | -8.47           | A        | <a href="#">PPQ08033B</a> |
| B07      | CSF2        | -7.69           | B        | <a href="#">PPQ00266A</a> |
| G07      | TNFSF11     | -6.79           | B        | <a href="#">PPQ05082B</a> |
| D08      | IL1A        | -5.32           | A        | <a href="#">PPQ05235B</a> |
| D10      | IL1R1       | -5.17           | A        | <a href="#">PPQ12806B</a> |
| B12      | CXCL13      | -5.07           | B        | <a href="#">PPQ00124A</a> |
| B06      | CSF1        | -4.28           | A        | <a href="#">PPQ06801A</a> |
| A05      | CCL13       | -4.19           | B        | <a href="#">PPQ14893B</a> |
| F11      | MIF         | -3.74           |          | <a href="#">PPQ00195A</a> |
| B08      | CX3CL1      | -3.28           | A        | <a href="#">PPQ00125A</a> |
| B03      | CCR8        | -2.89           | B        | <a href="#">PPQ00839B</a> |
| A09      | CCL23       | -2.68           | B        | <a href="#">PPQ00261A</a> |
| F10      | LTA         | -2.64           | B        | <a href="#">PPQ15229B</a> |
| F08      | CCL7        | -2.51           | B        | <a href="#">PPQ14785B</a> |
| H09      | RTC         | -2.38           |          | <a href="#">PPX63340A</a> |
| C11      | IL12B       | -2.34           | B        | <a href="#">PPQ01495B</a> |
| H08      | RTC         | -2.21           |          | <a href="#">PPX63340A</a> |
| H05      | RPL13A      | -2.20           |          | <a href="#">PPQ00210B</a> |
| F05      | IL13RA2     | -2.09           | B        | <a href="#">PPQ10644A</a> |
| G08      | TNFSF13B    | -2.09           |          | <a href="#">PPQ00923B</a> |

## Volcano Plot

| Test Group | Control Group | Fold Regulation Threshold | p-Value Threshold |
|------------|---------------|---------------------------|-------------------|
| Group 1    | Control Group | 2                         | 0.05              |

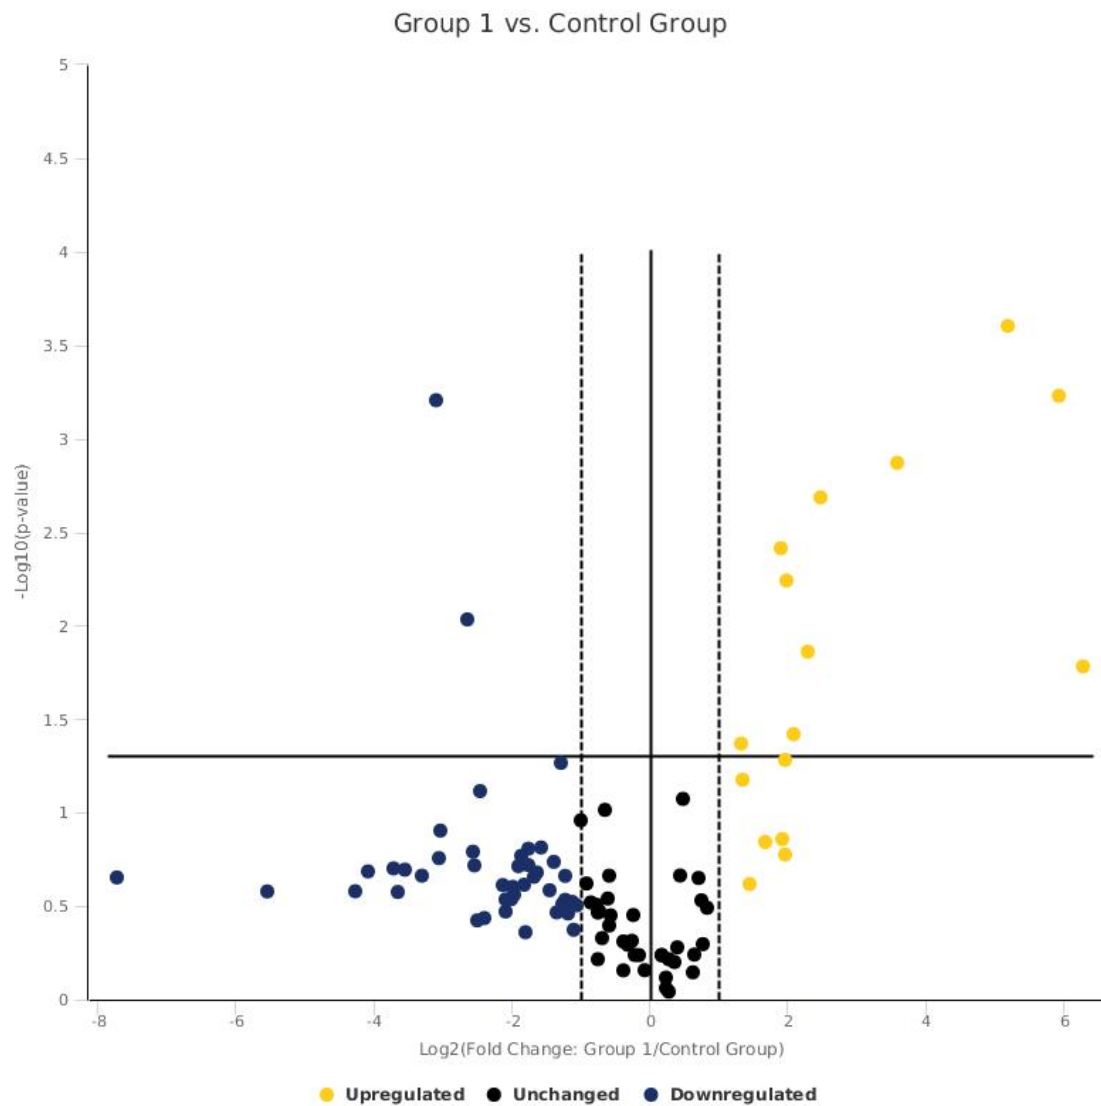

The volcano plot helps quickly identify significant gene expression changes. The volcano plot displays statistical significance versus fold-change on the y- and x-axes, respectively. The volcano plot combines a p-value statistical test with the fold regulation change enabling identification of genes with both large and small expression changes that are statistically significant.

## Genes Over-Expressed in Group 1 vs. Control Group

| Position | Gene Symbol | Fold Regulation | p-Value  | Comments | RT2 Catalog               |
|----------|-------------|-----------------|----------|----------|---------------------------|
| G03      | SPP1        | 77.25           | 0.016522 |          | <a href="#">PPQ08393A</a> |
| A01      | AIMP1       | 60.62           | 0.000589 |          | <a href="#">PPQ01772B</a> |
| G06      | TNFSF10     | 36.72           | 0.000249 | A        | <a href="#">PPQ01300B</a> |
| C09      | IL10RB      | 11.93           | 0.001345 | A        | <a href="#">PPQ09121B</a> |
| D04      | IL15RA      | 5.58            | 0.002062 | A        | <a href="#">PPQ13502B</a> |
| A02      | BMP2        | 4.90            | 0.013781 |          | <a href="#">PPQ17096A</a> |
| B11      | CXCL12      | 4.23            | 0.038022 | A        | <a href="#">PPQ00230A</a> |
| F02      | CXCL8       | 3.93            | 0.005739 |          | <a href="#">PPQ00298A</a> |
| F12      | NAMPT       | 3.72            | 0.003853 |          | <a href="#">PPQ04187A</a> |
| F03      | CXCR2       | 2.51            | 0.042693 |          | <a href="#">PPQ05376B</a> |

---

## Genes Under-Expressed in Group 1 vs. Control Group

| Position | Gene Symbol | Fold Regulation | p-Value  | Comments | RT2 Catalog               |
|----------|-------------|-----------------|----------|----------|---------------------------|
| B06      | CSF1        | -8.58           | 0.000622 | A        | <a href="#">PPQ06801A</a> |
| B08      | CX3CL1      | -6.26           | 0.009253 | A        | <a href="#">PPQ00125A</a> |

| Test Group | Control Group | Fold Regulation Threshold | p-Value Threshold |
|------------|---------------|---------------------------|-------------------|
| Group 2    | Control Group | 2                         | 0.05              |

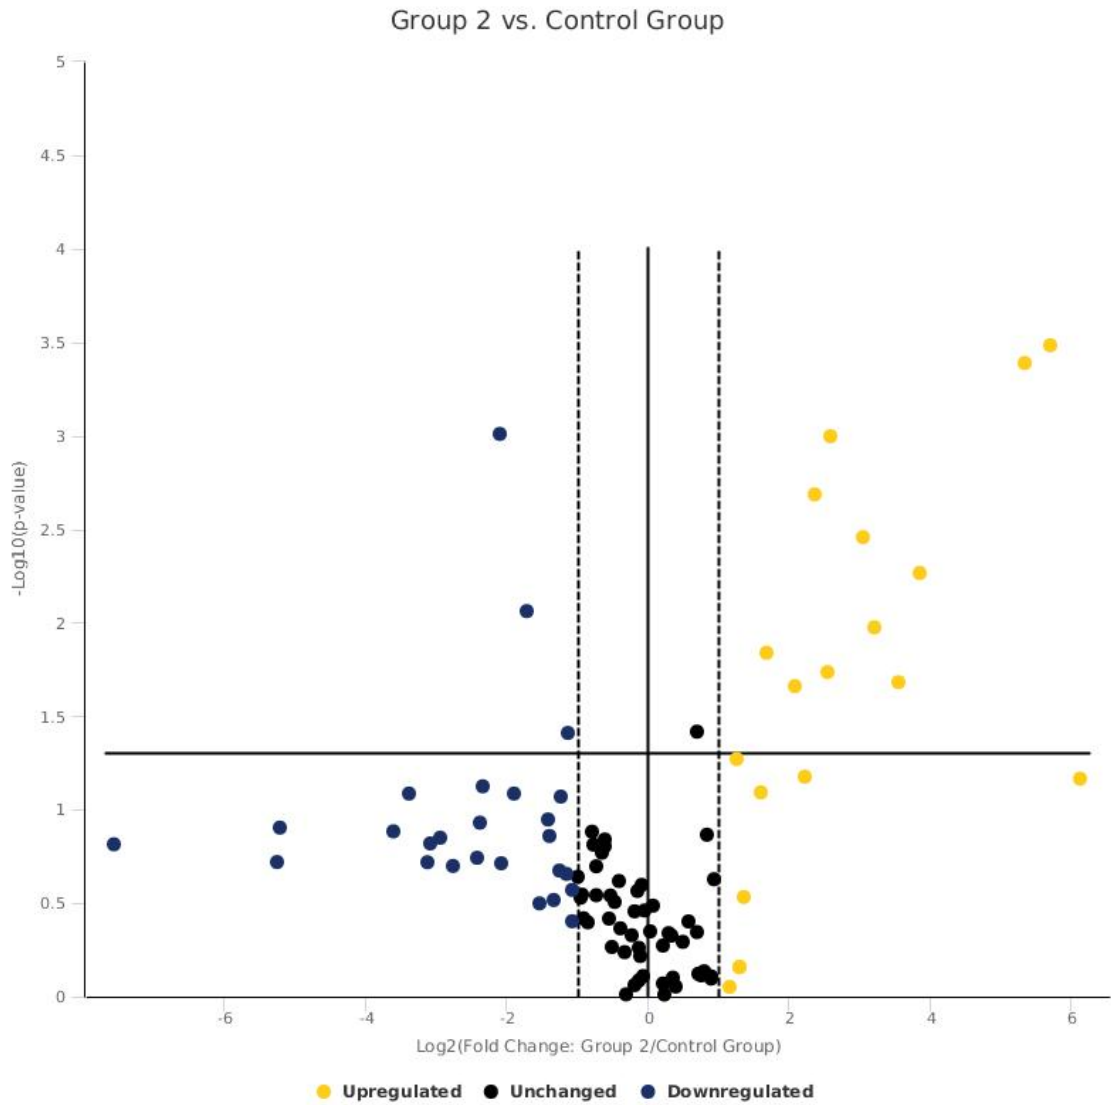

The volcano plot helps quickly identify significant gene expression changes. The volcano plot displays statistical significance versus fold-change on the y- and x-axes, respectively. The volcano plot combines a p-value statistical test with the fold regulation change enabling identification of genes with both large and small expression changes that are statistically significant.

## Genes Over-Expressed in Group 2 vs. Control Group

| Position | Gene Symbol | Fold Regulation | p-Value  | Comments | RT2 Catalog               |
|----------|-------------|-----------------|----------|----------|---------------------------|
| A01      | AIMP1       | 52.35           | 0.000328 |          | <a href="#">PPQ01772B</a> |
| G06      | TNFSF10     | 40.67           | 0.000409 | A        | <a href="#">PPQ01300B</a> |
| C09      | IL10RB      | 14.35           | 0.005420 | A        | <a href="#">PPQ09121B</a> |
| C10      | IL11RA      | 11.79           | 0.020823 |          | <a href="#">PPQ05242A</a> |
| F07      | IL9         | 9.26            | 0.010594 |          | <a href="#">PPQ13177A</a> |
| D05      | IL16        | 8.23            | 0.003486 |          | <a href="#">PPQ00006A</a> |
| E12      | IL6R        | 5.96            | 0.001006 |          | <a href="#">PPQ16038B</a> |
| A02      | BMP2        | 5.85            | 0.018389 |          | <a href="#">PPQ17096A</a> |
| B11      | CXCL12      | 5.17            | 0.002062 |          | <a href="#">PPQ00230A</a> |
| D04      | IL15RA      | 4.24            | 0.021867 |          | <a href="#">PPQ13502B</a> |
| F12      | NAMPT       | 3.20            | 0.014483 |          | <a href="#">PPQ04187A</a> |

---

## Genes Under-Expressed in Group 2 vs. Control Group

| Position | Gene Symbol | Fold Regulation | p-Value  | Comments | RT2 Catalog               |
|----------|-------------|-----------------|----------|----------|---------------------------|
| B06      | CSF1        | -4.28           | 0.000978 | A        | <a href="#">PPQ06801A</a> |
| B08      | CX3CL1      | -3.28           | 0.008666 | A        | <a href="#">PPQ00125A</a> |
| H05      | RPL13A      | -2.20           | 0.038891 |          | <a href="#">PPQ00210B</a> |

## Heat Map

| Treated Group | Control Group |
|---------------|---------------|
| Group 1       | Control Group |

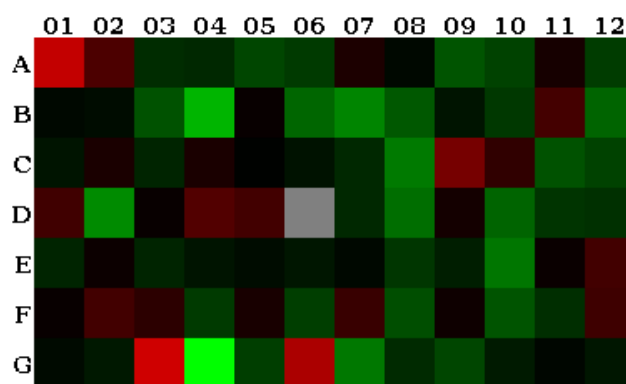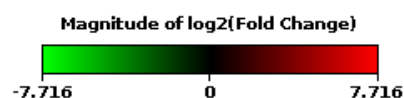

| Layout | 01                   | 02                  | 03                  | 04                    | 05                     | 06                      | 07                     | 08                    | 09                    | 10                   | 11                  | 12                    |
|--------|----------------------|---------------------|---------------------|-----------------------|------------------------|-------------------------|------------------------|-----------------------|-----------------------|----------------------|---------------------|-----------------------|
| A      | AIMP1<br>60.62       | BMP2<br>4.90        | CCL1<br>-2.54<br>B  | CCL11<br>-2.35<br>B   | CCL13<br>-4.27<br>B    | CCL17<br>-3.38<br>B     | CCL2<br>1.77<br>B      | CCL20<br>-1.19<br>B   | CCL23<br>-5.90<br>B   | CCL5<br>-3.91<br>B   | CCR1<br>1.56<br>B   | CCR3<br>-3.49<br>B    |
| B      | CCR4<br>-1.17<br>B   | CCR6<br>-1.30<br>B  | CCR8<br>-5.68<br>B  | CD40LG<br>-46.37<br>A | CD70<br>1.17<br>B      | CSF1<br>-8.58<br>A      | CSF2<br>-16.96<br>B    | CX3CL1<br>-6.26<br>A  | CX3CR1<br>-1.51<br>A  | CXCL11<br>-3.21<br>A | CXCL12<br>4.23<br>A | CXCL13<br>-8.17<br>B  |
| C      | CXCL6<br>-1.53<br>B  | CXCL9<br>1.69<br>B  | CXCR1<br>-2.16<br>B | CXCR4<br>1.71<br>B    | FASLG<br>-1.05<br>B    | IFNA2<br>-1.47<br>B     | IFNG<br>-2.28<br>B     | IL10RA<br>-13.18<br>A | IL10RB<br>11.93<br>A  | IL11RA<br>2.71<br>A  | IL12B<br>-5.49<br>B | IL12RB1<br>-4.01<br>B |
| D      | IL12RB2<br>3.77<br>B | IL13<br>-19.17<br>B | IL15<br>1.20<br>B   | IL15RA<br>5.58<br>A   | IL16<br>3.92<br>B      | IL17A<br>1.12<br>C      | IL17F<br>-2.32<br>B    | IL1A<br>-9.86<br>A    | IL1B<br>1.53<br>A     | IL1R1<br>-8.30<br>A  | IL1R2<br>-2.97<br>B | IL1RN<br>-2.74<br>B   |
| E      | IL2<br>-2.17<br>B    | IL20<br>1.28<br>B   | IL21<br>-2.09<br>B  | IL2RA<br>-1.50<br>B   | IL2RB<br>-1.31<br>B    | IL2RG<br>-1.56<br>B     | IL3<br>-1.18<br>B      | IL4<br>-3.10<br>B     | IL5<br>-1.88<br>B     | IL5RA<br>-11.77<br>A | IL6<br>1.21<br>B    | IL6R<br>3.92          |
| F      | IL7<br>1.17<br>B     | CXCL8<br>3.93       | CXCR2<br>2.51       | IL9R<br>-3.37<br>B    | IL13RA2<br>1.64<br>A   | LOC710618<br>-3.74<br>B | IL9<br>3.20<br>B       | CCL7<br>-5.23<br>B    | CCL26<br>1.31<br>B    | LTA<br>-5.82<br>B    | MIF<br>-2.62        | NAMPT<br>3.72         |
| G      | OSM<br>-1.25<br>B    | PF4<br>-1.69<br>B   | SPP1<br>77.25       | TNF<br>-210.24<br>A   | TNFRSF11<br>B<br>-3.63 | TNFSF10<br>36.72<br>A   | TNFSF11<br>-12.54<br>B | TNFSF13B<br>-2.42     | TNFSF14<br>-4.26<br>B | TNFSF4<br>-1.69      | VEGFA<br>-1.12      | XCL1<br>-1.61<br>A    |

The Heat Map provides a visualization of the fold changes in expression between the selected groups for every gene in the array in the context of the array layout. The table provides the fold regulation data used for the map as well as the Comments associated with each one.



| Treated Group | Control Group |
|---------------|---------------|
| Group 2       | Control Group |

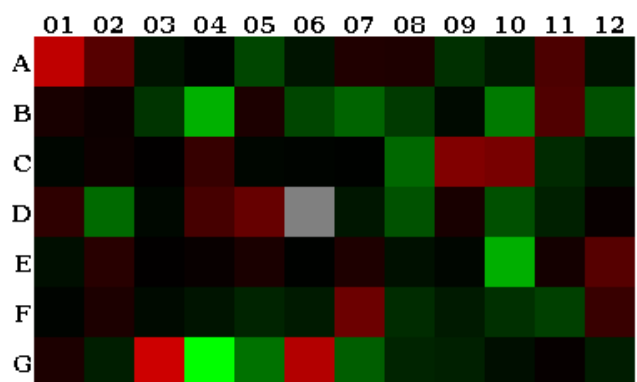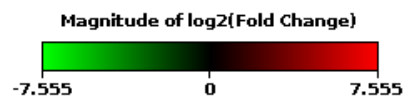

| Layout | 01      | 02    | 03    | 04      | 05        | 06        | 07      | 08       | 09      | 10     | 11     | 12      |
|--------|---------|-------|-------|---------|-----------|-----------|---------|----------|---------|--------|--------|---------|
| A      | AIMP1   | BMP2  | CCL1  | CCL11   | CCL13     | CCL17     | CCL2    | CCL20    | CCL23   | CCL5   | CCR1   | CCR3    |
|        | 52.35   | 5.85  | -1.45 | -1.07   | -4.19     | -1.52     | 1.92    | 1.85     | -2.68   | -1.66  | 4.67   | -1.47   |
| B      | CCR4    | CCR6  | CCR8  | CD40LG  | CD70      | CSF1      | CSF2    | CX3CL1   | CX3CR1  | CXCL11 | CXCL12 | CXCL13  |
|        | 1.65    | 1.28  | -2.89 | -38.17  | 1.75      | -4.28     | -7.69   | -3.28    | -1.25   | -12.17 | 5.17   | -5.07   |
| C      | CXCL6   | CXCL9 | CXCR1 | CXCR4   | FASLG     | IFNA2     | IFNG    | IL10RA   | IL10RB  | IL11RA | IL12B  | IL12RB1 |
|        | -1.13   | 1.32  | 1.02  | 3.04    | -1.11     | -1.09     | -1.04   | -8.47    | 14.35   | 11.79  | -2.34  | -1.43   |
| D      | IL12RB2 | IL13  | IL15  | IL15RA  | IL16      | IL17A     | IL17F   | IL1A     | IL1B    | IL1R1  | IL1R2  | IL1RN   |
|        | 2.57    | -8.70 | -1.17 | 4.24    | 8.23      | 2.47      | -1.56   | -5.32    | 1.61    | -5.17  | -1.89  | 1.16    |
| E      | IL2     | IL20  | IL21  | IL2RA   | IL2RB     | IL2RG     | IL3     | IL4      | IL5     | IL5RA  | IL6    | IL6R    |
|        | -1.33   | 2.24  | 1.05  | 1.17    | 1.69      | -1.05     | 1.86    | -1.39    | -1.14   | -37.21 | 1.48   | 5.96    |
| F      | IL7     | CXCL8 | CXCR2 | IL9R    | IL13RA2   | LOC710618 | IL9     | CCL7     | CCL26   | LTA    | MIF    | NAMPT   |
|        | -1.09   | 1.78  | -1.24 | -1.53   | -2.09     | -1.70     | 9.26    | -2.51    | -1.73   | -2.64  | -3.74  | 3.20    |
| G      | OSM     | PF4   | SPP1  | TNF     | TNFRSF11B | TNFSF10   | TNFSF11 | TNFSF13B | TNFSF14 | TNFSF4 | VEGFA  | XCL1    |
|        | 1.76    | -1.89 | 69.35 | -188.08 | -10.45    | 40.67     | -6.79   | -2.09    | -1.93   | -1.31  | 1.15   | -1.81   |

The Heat Map provides a visualization of the fold changes in expression between the selected groups for every gene in the array in the context of the array layout. The table provides the fold regulation data used for the map as well as the Comments associated with each one.

## ClusterGram

| Sample | Dimension | Join Type | Color Coded |
|--------|-----------|-----------|-------------|
| Array  | 2-D       | Average   | Genes       |

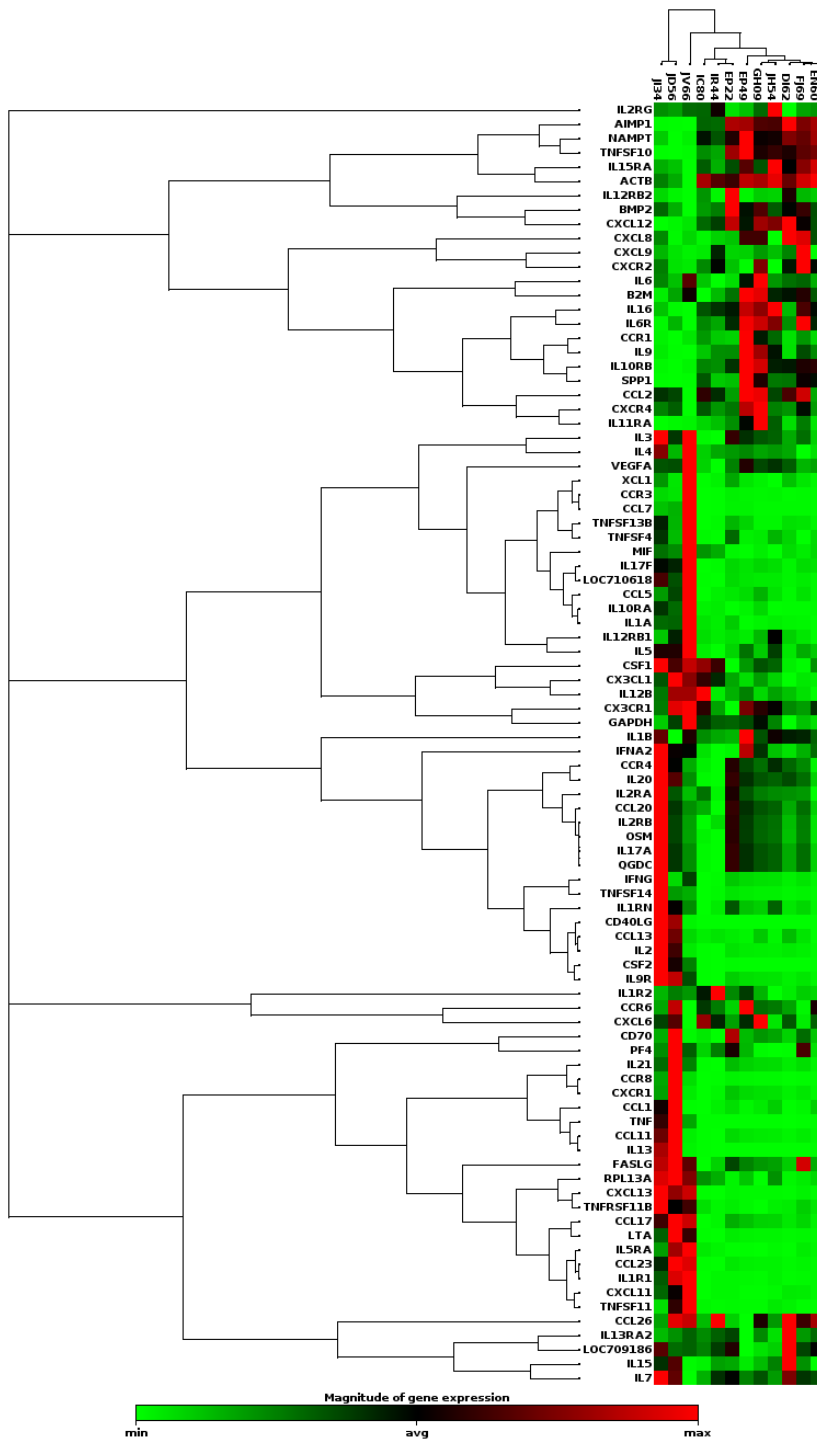

The clustergram performs non-supervised hierarchical clustering of the entire dataset to display a heat map with dendrograms indicating co-regulated genes across groups or individual samples.

---

## What's next?

Thank you for using the RT<sup>2</sup> Profiler Data Analysis Software.

The Data Analysis software delivers a list of expression changes in the samples from the supplied data. However, this result often only starts an investigation into the underlying mechanisms at work. In order to assist in further analysis, the QIAGEN now utilizes the latest bioinformatics tools to analyze the data and suggest regulatory mechanisms and future experiments. Please review the results from the selected tools below.

**Gene Expression:** This tool will help define a panel of genes based on this experiment's results. This panel may represent a putative biomarker set, a target gene set or simply a collection of genes. The tool is designed to deliver a list of gene expression assays that would allow the user to follow-up the results of the analyzed experiment.

**miRNA Regulation:** This tool will identify candidate miRNA regulators in your experimental system. The tool is designed to deliver a list of miRNAs that could be targeting the genes that had observed changes in expression in your selected samples.

**DNA Methylation:** This tool will help define a panel of differentially expressed genes based on this experiment's results. Altered methylation patterns on the genes' promoters may be responsible for these gene expression changes. This tool is designed to deliver a list of available DNA methylation assays for those differentially expressed genes that would allow the user to follow-up their gene expression experiment with an epigenetic analysis.

**Transcription Factor / Histone:** This tool will help define a panel of differentially expressed genes based on this experiment's results. Altered transcription factor binding activity on the genes' promoters may be responsible for these gene expression changes. Altered histone modification patterns on the genes' promoters may also be responsible for these gene expression changes. This tool is designed to deliver a list of the transcription factors that might regulate the selected differentially expressed genes as well as the available respective gene-specific real-time PCR assays for DNA from anti-transcription factor or anti-histone chromatin immunoprecipitations. These assays would then allow the user to follow-up their gene expression experiment with an epigenetic analysis.

**siRNA:** This tool will help define a panel of differentially expressed genes based on this experiment's results. These differentially expressed genes may contribute to the observed differences between the tested sample groups. This tool is designed to deliver a list of differentially expressed genes and corresponding siRNA reagents to test the contribution of each differentially-expressed gene in the experiment. These siRNAs would then allow the user to follow-up their gene expression experiment with a functional analysis.

**Somatic Mutation:** This tool will help define a panel of genes based on this experiment's results. Mutations in these genes

---

may affect whether their expression changes have any effect or different effects on the experimental model system. The tool is designed to deliver a list of available somatic mutation assays for these differentially expressed genes that would allow the user to follow-up the results of the analyzed experiment.

## Gene Expression, DNA Methylation, RNAi, Somatic Mutation

| Test Group | Control Group | Fold Regulation Threshold | p-Value Threshold |
|------------|---------------|---------------------------|-------------------|
| Group 1    | Control Group | 2                         | 0.05              |

| Position | Symbol  | Fold Regulation | p-Value  | RT2 qPCR Assay            | EpiTect Methyl II qPCR Assay | FlexiTube siRNA             | Somatic Mutation Assay  |
|----------|---------|-----------------|----------|---------------------------|------------------------------|-----------------------------|-------------------------|
| G03      | SPP1    | 77.25           | 0.016522 | <a href="#">PPQ08393A</a> | <a href="#">Inquire</a>      | <a href="#">View siRNAs</a> | <a href="#">Inquire</a> |
| A01      | AIMP1   | 60.62           | 0.000589 | <a href="#">PPQ01772B</a> | <a href="#">Inquire</a>      | <a href="#">View siRNAs</a> | <a href="#">Inquire</a> |
| G06      | TNFSF10 | 36.72           | 0.000249 | <a href="#">PPQ01300B</a> | <a href="#">Inquire</a>      | <a href="#">View siRNAs</a> | <a href="#">Inquire</a> |
| C09      | IL10RB  | 11.93           | 0.001345 | <a href="#">PPQ09121B</a> | <a href="#">Inquire</a>      | <a href="#">View siRNAs</a> | <a href="#">Inquire</a> |
| B06      | CSF1    | -8.58           | 0.000622 | <a href="#">PPQ06801A</a> | <a href="#">Inquire</a>      | <a href="#">View siRNAs</a> | <a href="#">Inquire</a> |
| B08      | CX3CL1  | -6.26           | 0.009253 | <a href="#">PPQ00125A</a> | <a href="#">Inquire</a>      | <a href="#">View siRNAs</a> | <a href="#">Inquire</a> |
| D04      | IL15RA  | 5.58            | 0.002062 | <a href="#">PPQ13502B</a> | <a href="#">Inquire</a>      | <a href="#">View siRNAs</a> | <a href="#">Inquire</a> |

| Test Group | Control Group | Fold Regulation Threshold | p-Value Threshold |
|------------|---------------|---------------------------|-------------------|
| Group 2    | Control Group | 2                         | 0.05              |

| Position | Symbol  | Fold Regulation | p-Value  | RT2 qPCR Assay            | EpiTect Methyl II qPCR Assay | FlexiTube siRNA             | Somatic Mutation Assay  |
|----------|---------|-----------------|----------|---------------------------|------------------------------|-----------------------------|-------------------------|
| A01      | AIMP1   | 52.35           | 0.000328 | <a href="#">PPQ01772B</a> | <a href="#">Inquire</a>      | <a href="#">View siRNAs</a> | <a href="#">Inquire</a> |
| G06      | TNFSF10 | 40.67           | 0.000409 | <a href="#">PPQ01300B</a> | <a href="#">Inquire</a>      | <a href="#">View siRNAs</a> | <a href="#">Inquire</a> |
| C09      | IL10RB  | 14.35           | 0.005420 | <a href="#">PPQ09121B</a> | <a href="#">Inquire</a>      | <a href="#">View siRNAs</a> | <a href="#">Inquire</a> |
| C10      | IL11RA  | 11.79           | 0.020823 | <a href="#">PPQ05242A</a> | <a href="#">Inquire</a>      | <a href="#">View siRNAs</a> | <a href="#">Inquire</a> |
| F07      | IL9     | 9.26            | 0.010594 | <a href="#">PPQ13177A</a> | <a href="#">Inquire</a>      | <a href="#">View siRNAs</a> | <a href="#">Inquire</a> |
| D05      | IL16    | 8.23            | 0.003486 | <a href="#">PPQ00006A</a> | <a href="#">Inquire</a>      | <a href="#">View siRNAs</a> | <a href="#">Inquire</a> |
| E12      | IL6R    | 5.96            | 0.001006 | <a href="#">PPQ16038B</a> | <a href="#">Inquire</a>      | <a href="#">View siRNAs</a> | <a href="#">Inquire</a> |
| A02      | BMP2    | 5.85            | 0.018389 | <a href="#">PPQ17096A</a> | <a href="#">Inquire</a>      | <a href="#">View siRNAs</a> | <a href="#">Inquire</a> |
| B11      | CXCL12  | 5.17            | 0.002062 | <a href="#">PPQ00230A</a> | <a href="#">Inquire</a>      | <a href="#">View siRNAs</a> | <a href="#">Inquire</a> |

---

## miRNA Regulation

| Test Group | Control Group | Fold Regulation Threshold | p-Value Threshold |
|------------|---------------|---------------------------|-------------------|
| Group 1    | Control Group | 2                         | 0.05              |

## Genes Under-Expressed in Group 1 vs. Control Group

| Position | Gene Symbol | Fold Regulation | p-Value  |
|----------|-------------|-----------------|----------|
| B06      | CSF1        | -8.58           | 0.000622 |
| B08      | CX3CL1      | -6.26           | 0.009253 |

## miRNA Regulating Genes Under-Expressed in Group 1 vs. Control Group

| miRNA Name | Strongest Strength Score | miScript Assay | miScript Mimic | miScript Inhibitor | Target Genes |
|------------|--------------------------|----------------|----------------|--------------------|--------------|
|------------|--------------------------|----------------|----------------|--------------------|--------------|

---

## Genes Over-Expressed in Group 1 vs. Control Group

| Position | Gene Symbol | Fold Regulation | p-Value  |
|----------|-------------|-----------------|----------|
| G03      | SPP1        | 77.25           | 0.016522 |
| A01      | AIMP1       | 60.62           | 0.000589 |
| G06      | TNFSF10     | 36.72           | 0.000249 |
| C09      | IL10RB      | 11.93           | 0.001345 |
| D04      | IL15RA      | 5.58            | 0.002062 |

## miRNA Regulating Genes Over-Expressed in Group 1 vs. Control Group

| miRNA Name | Strongest Strength Score | miScript Assay | miScript Mimic | miScript Inhibitor | Target Genes |
|------------|--------------------------|----------------|----------------|--------------------|--------------|
|------------|--------------------------|----------------|----------------|--------------------|--------------|



---

| Test Group | Control Group | Fold Regulation Threshold | p-Value Threshold |
|------------|---------------|---------------------------|-------------------|
| Group 2    | Control Group | 2                         | 0.05              |

Genes Under-Expressed in Group 2 vs. Control Group

| Position | Gene Symbol | Fold Regulation | p-Value |
|----------|-------------|-----------------|---------|
|----------|-------------|-----------------|---------|

miRNA Regulating Genes Under-Expressed in Group 2 vs. Control Group

| miRNA Name | Strongest Strength Score | miScript Assay | miScript Mimic | miScript Inhibitor | Target Genes |
|------------|--------------------------|----------------|----------------|--------------------|--------------|
|------------|--------------------------|----------------|----------------|--------------------|--------------|

## Genes Over-Expressed in Group 2 vs. Control Group

| Position | Gene Symbol | Fold Regulation | p-Value  |
|----------|-------------|-----------------|----------|
| A01      | AIMP1       | 52.35           | 0.000328 |
| G06      | TNFSF10     | 40.67           | 0.000409 |
| C09      | IL10RB      | 14.35           | 0.005420 |
| C10      | IL11RA      | 11.79           | 0.020823 |
| F07      | IL9         | 9.26            | 0.010594 |
| D05      | IL16        | 8.23            | 0.003486 |
| E12      | IL6R        | 5.96            | 0.001006 |
| A02      | BMP2        | 5.85            | 0.018389 |
| B11      | CXCL12      | 5.17            | 0.002062 |

## miRNA Regulating Genes Over-Expressed in Group 2 vs. Control Group

| miRNA Name | Strongest Strength Score | miScript Assay | miScript Mimic | miScript Inhibitor | Target Genes |
|------------|--------------------------|----------------|----------------|--------------------|--------------|
|------------|--------------------------|----------------|----------------|--------------------|--------------|

---

## Transcription Factor / Histone

| Test Group | Control Group | Fold Regulation Threshold | p-Value Threshold |
|------------|---------------|---------------------------|-------------------|
| Group 1    | Control Group | 2                         | 0.05              |

## Genes Differentially Expressed in Group 1 vs. Control Group

| Position | Gene Symbol | Fold Regulation | p-Value  | Transcription Factors | EpiTect ChIP qPCR Assay |
|----------|-------------|-----------------|----------|-----------------------|-------------------------|
| G03      | SPP1        | 77.25           | 0.016522 |                       |                         |
| A01      | AIMP1       | 60.62           | 0.000589 |                       |                         |
| G06      | TNFSF10     | 36.72           | 0.000249 |                       |                         |
| C09      | IL10RB      | 11.93           | 0.001345 |                       |                         |
| B06      | CSF1        | -8.58           | 0.000622 |                       |                         |
| B08      | CX3CL1      | -6.26           | 0.009253 |                       |                         |
| D04      | IL15RA      | 5.58            | 0.002062 |                       |                         |

| Test Group | Control Group | Fold Regulation Threshold | p-Value Threshold |
|------------|---------------|---------------------------|-------------------|
| Group 2    | Control Group | 2                         | 0.05              |

## Genes Differentially Expressed in Group 2 vs. Control Group

| Position | Gene Symbol | Fold Regulation | p-Value  | Transcription Factors | EpiTect ChIP qPCR Assay |
|----------|-------------|-----------------|----------|-----------------------|-------------------------|
| A01      | AIMP1       | 52.35           | 0.000328 |                       |                         |
| G06      | TNFSF10     | 40.67           | 0.000409 |                       |                         |
| C09      | IL10RB      | 14.35           | 0.005420 |                       |                         |
| C10      | IL11RA      | 11.79           | 0.020823 |                       |                         |
| F07      | IL9         | 9.26            | 0.010594 |                       |                         |
| D05      | IL16        | 8.23            | 0.003486 |                       |                         |
| E12      | IL6R        | 5.96            | 0.001006 |                       |                         |
| A02      | BMP2        | 5.85            | 0.018389 |                       |                         |
| B11      | CXCL12      | 5.17            | 0.002062 |                       |                         |

---

## Next steps

After using QIAGEN's RT<sup>2</sup> Profiler PCR array, use the upregulated or downregulated qPCR assays to further validate your hypothesis.

You can use individual qPCR RT<sup>2</sup> assays or create custom RT<sup>2</sup> PCR arrays.

Further, you can use the assay and other products discussed above in the "What's next?" section to design additional studies on the expression and function of miRNAs regulating the differentially expressed genes, somatic mutations in those genes, epigenetic marks (such as modified histones, transcription factor binding, and DNA methylation) at the promoters of those genes, or study the genes' function using gene-specific siRNA.

---

# Glossary

## Comments

**A:** This gene's average threshold cycle is relatively high ( $> 30$ ) in either the control or the test sample, and is reasonably low in the other sample ( $< 30$ ). These data mean that the gene's expression is relatively low in one sample and reasonably detected in the other sample suggesting that the actual fold-change value is at least as large as the calculated and reported fold-change result. This fold-change result may also have greater variations if  $p$  value  $> 0.05$ ; therefore, it is important to have a sufficient number of biological replicates to validate the result for this gene.

**B:** This gene's average threshold cycle is relatively high ( $> 30$ ), meaning that its relative expression level is low, in both control and test samples, and the  $p$ -value for the fold-change is either unavailable or relatively high ( $p > 0.05$ ). This fold-change result may also have greater variations; therefore, it is important to have a sufficient number of biological replicates to validate the result for this gene.

**C:** This gene's average threshold cycle is either not determined or greater than the defined cut-off (default 35), in both samples meaning that its expression was undetected, making this fold-change result erroneous and un-interpretable.
